# Supplementary material
Source: PubMed Central journal article supplement (PMC7064427)
Supplement: NIHMS1065492-supplement-supp_Figures.pdf [file NIHMS1065492-supplement-supp_Figures.pdf]

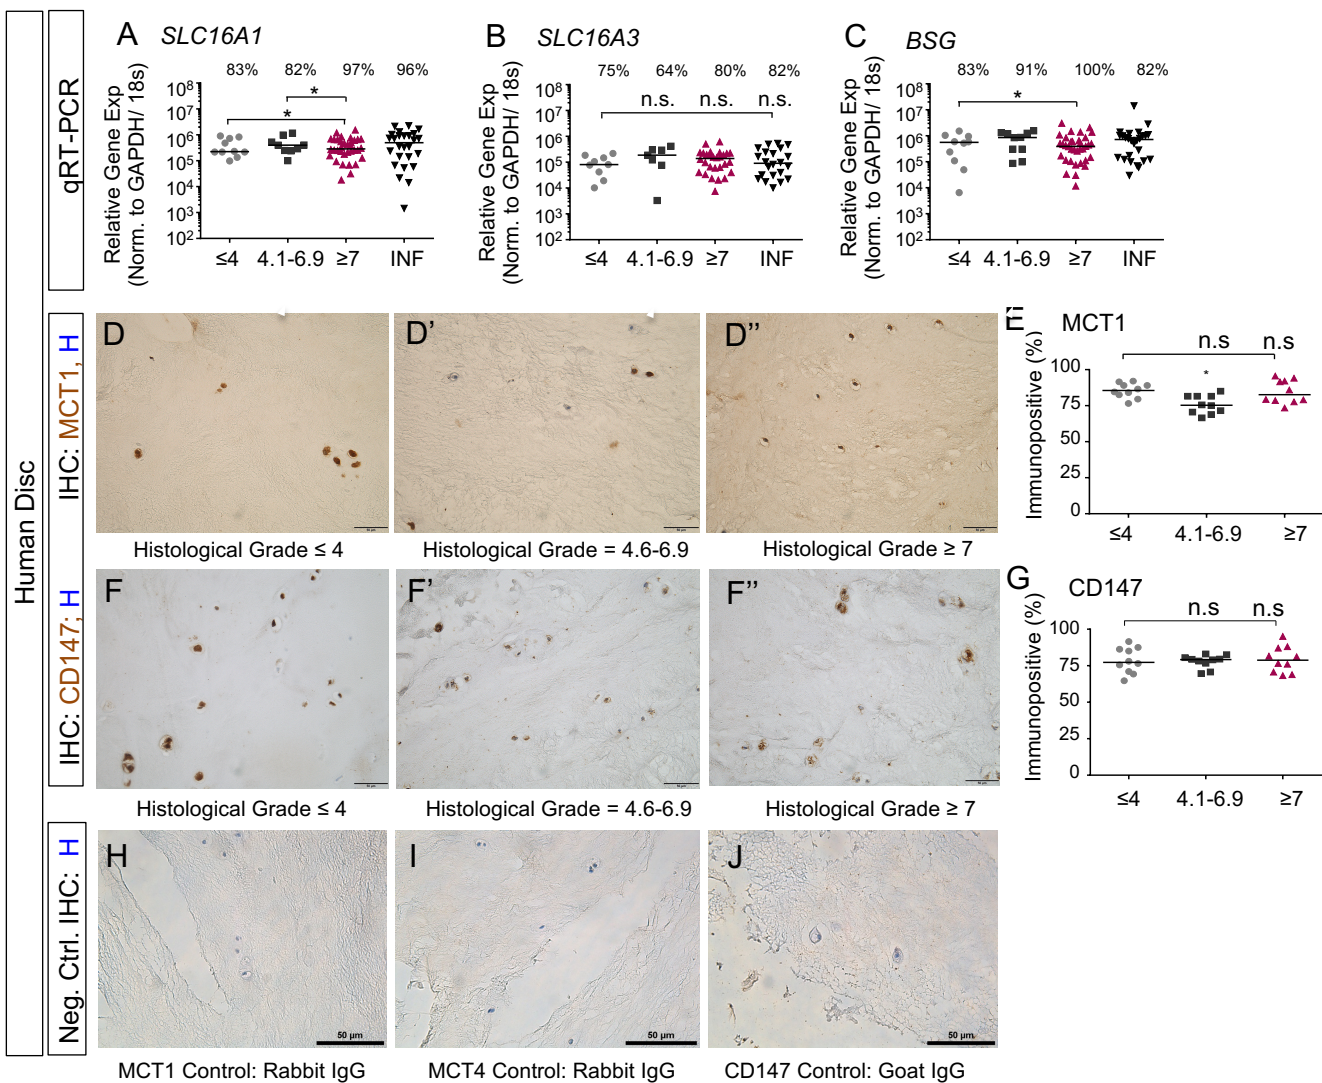

Supplemental Figure 1: Levels of *SLC16A1* (MCT1), *SLC16A3* (MCT4) and *BSG* (CD147) Expression in Human Disc Tissue

A-C) qRT-PCR expression levels of *SLC16A1*, *SLC16A3*, and *BSG* mRNA in healthy (4), moderately-degenerate (4.6-6.9), severely-degenerate (7), and immune cell-infiltrated (INF) human discs. Graphs display the percent of disc samples expressing mRNA in each group.

D-D'') Representative immunohistochemical images showing MCT1-positive cells and MCT1-negative cells in healthy (D), moderately-degenerate (D'), and severely-degenerate (D'') human samples.

E) Percent MCT1 immunopositivity in healthy, moderately-, and severely-degenerate human discs. F-F'') Representative immunohistochemical images showing CD147-positive cells and CD147-negative cells in healthy (F), mid-degenerate (F'), and severe degenerate (F'') human samples.

G) Percent CD147 immunopositivity in healthy, moderately-, and severely-degenerate human discs. H-J) Negative control IHC for MCT1 (H) and MCT4 (I) with Rabbit IgG, and CD147 (J) with Goat IgG. Lack of HRP-positive staining indicates antibody specificity. Statistical analysis on non-parametric IHC quantification was performed by Kruskal Wallis and Conover Ingman post hoc test. n.s.= not significant.

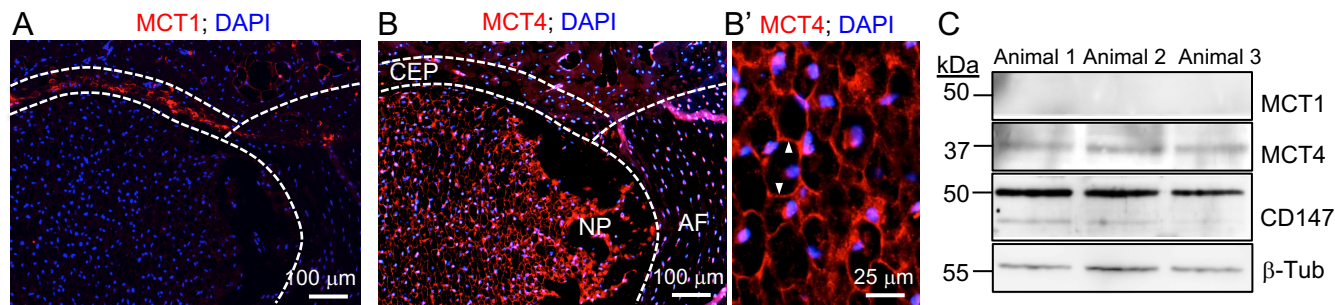

Supplemental Figure 2: Levels of MCT and CD147 Expression in Rodent Disc Tissue

A) Representative immunostaining showing MCT1 expression in the CEP. B, B') Representative immunostaining showing MCT4 expression in the NP compartment. C) Representative Western blot showing relative MCT1, MCT4, and CD147 expression in tissue protein lysate from rat NP.

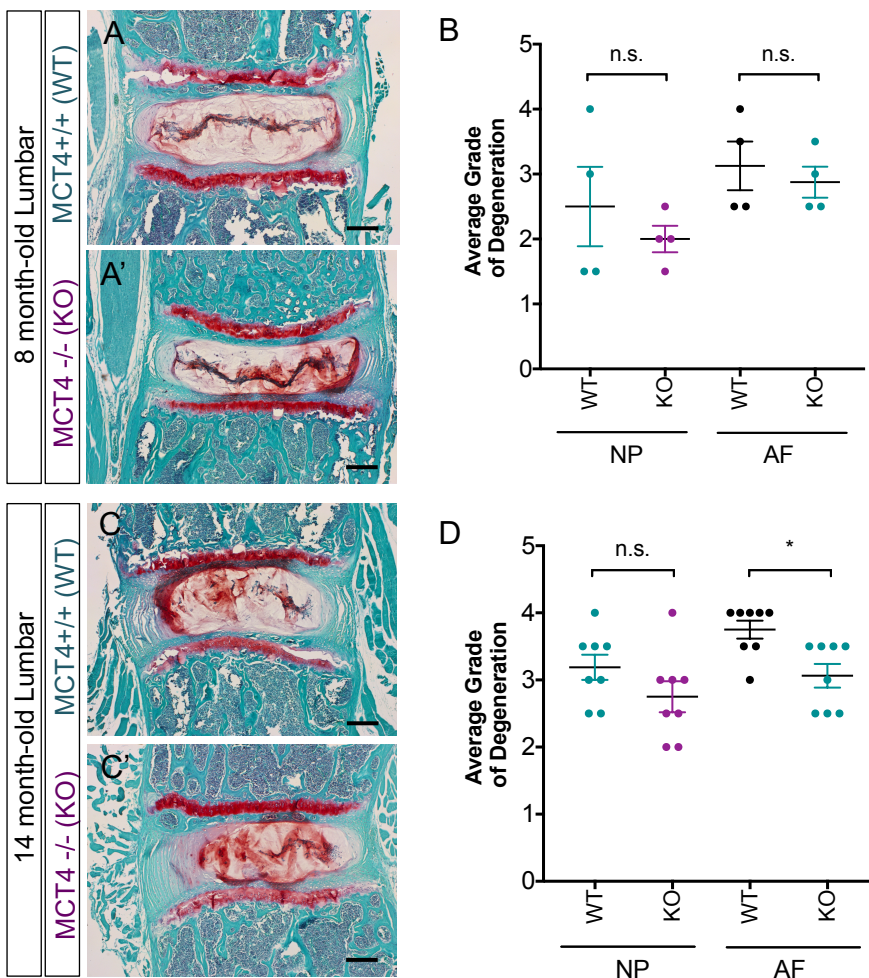

Supplemental Figure 3: Histological Grades of Degeneration in WT and MCT4 KO Lumbar Spine

A, A') Safranin-O/Fast Green staining of the intervertebral disc in 8 mo WT and global MCT4 KO mice (Scale bar = 200  $\mu$ m). C) Average modified-Thompson grade of NP and AF degeneration. C, C') Safranin-O/Fast Green staining of the intervertebral disc in 14 mo WT and global MCT4 KO mice (Scale bar = 200  $\mu$ m). C) Average modified-Thompson grade of NP and AF degeneration. Statistical analysis: *t*-test, n.s.= not significant; \*, *p*-value  $\leq$  0.05.

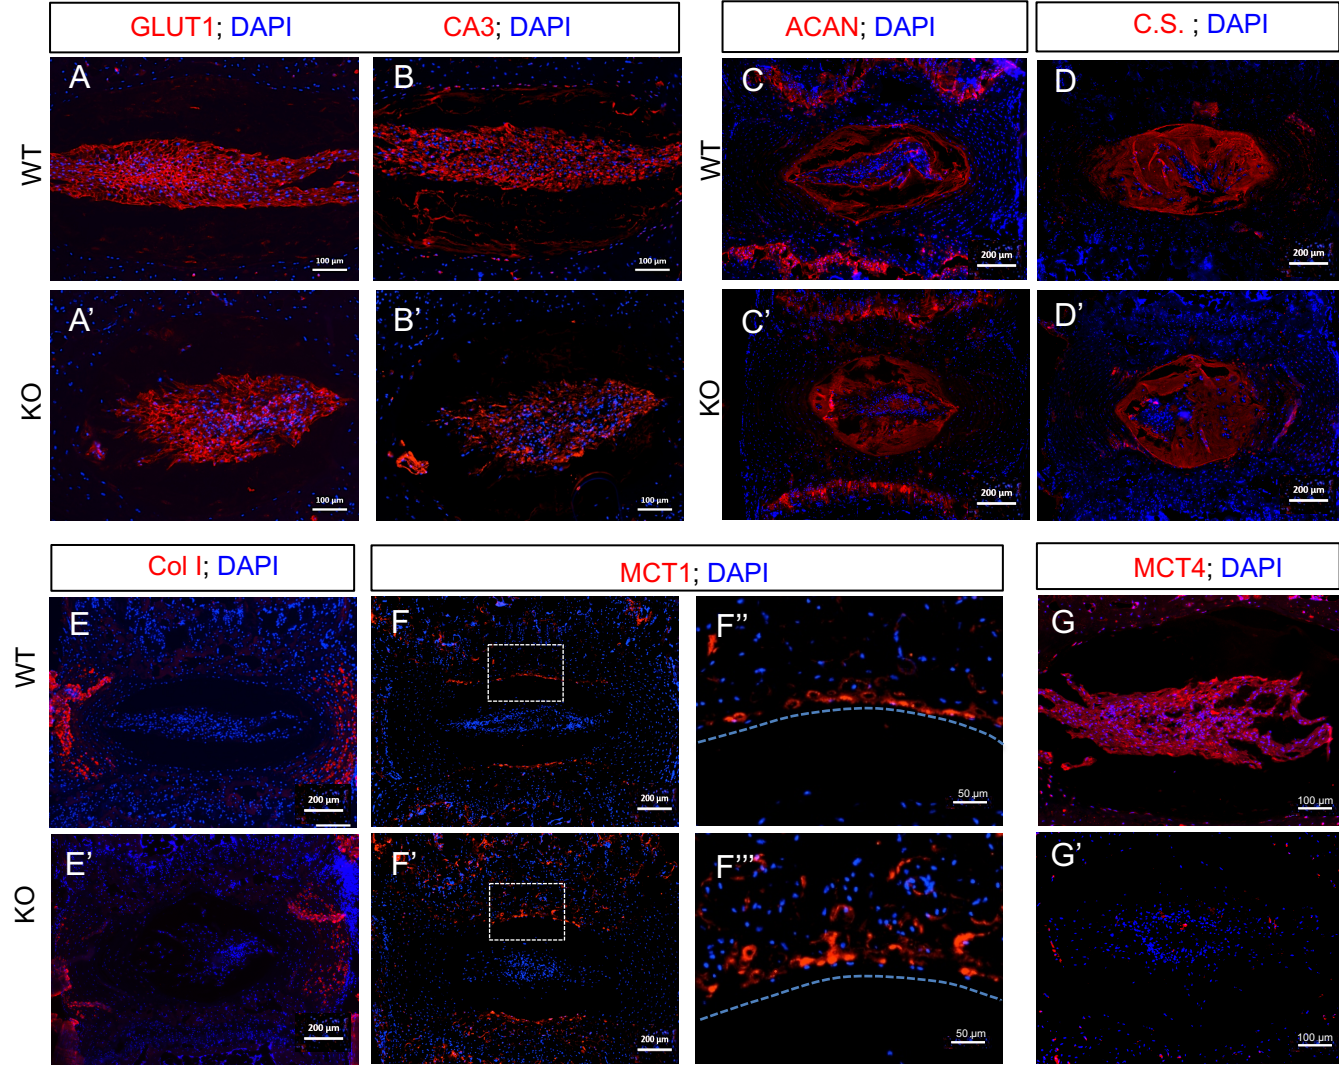

Supplemental Figure 4: Characterization of NP phenotype and matrix composition in MCT4 KO mice.

Representative immunostaining in the intervertebral discs of 14 mo WT and MCT4 KO mice. NP phenotypic markers: A, A') GLUT1; B, B') CA3. (Scale bars= 100  $\mu$ m). Extracellular matrix molecules: C, C') ACAN; D-D') Chondroitin Sulfate, E-E) Collagen I. (Scale bars= 200  $\mu$ m). F-F''') Expression of MCT1 is not compensatory for loss of MCT4. G, G') MCT4 expression is lost in MCT4 KO animals. Imaged at 10X and 20X (Left scale bars= 200  $\mu$ m; Right scale bars= 50  $\mu$ m). Dotted lines were drawn to demarcate different tissue compartments within the disc. All staining was performed using at least 3 animals/genotype corresponding to Grade 2.

|    | Reference | Source   | Age | IVD Level | Intact IVD? | Average Grade | Classification |
|----|-----------|----------|-----|-----------|-------------|---------------|----------------|
| HD | 40        | PM       | 74  | L2/L3     | Yes         | 11            | SD             |
| HD | 65        | Surgical | 43  | L4/L5     | No          | 10            | I              |
| HD | 71        | Surgical | 42  | L5/S1     | Yes         | 3             | ND             |
| HD | 89        | Surgical | 21  | L5/S1     | No          | 4             | ND             |
| HD | 98        | Surgical | 65  | L3/L4     | Yes         | 11            | SD             |
| HD | 103       | Surgical | 45  | C5/C6     | No          | 9.5           | SD             |
| HD | 145       | Surgical | 38  | L4/L5     | No          | 11            | I              |
| HD | 154       | Surgical | 52  | L4/L5     | No          | 11            | SD             |
| HD | 158       | Surgical | 38  | L4/L5     | No          | 7             | I              |
| HD | 159       | Surgical | 39  | L4/L5     | No          | 9             | I              |
| HD | 203       | Surgical | 45  | L5/S1     | Yes         | 4             | ND             |
| HD | 219       | Surgical | 54  | L5/S1     | No          | 11            | I              |
| HD | 229       | Surgical | 56  | L5        | Yes         | 6             | MD             |
| HD | 233       | Surgical | 44  | L5/S1     | Yes         | 10            | SD             |
| HD | 234       | Surgical | 54  | L5/S1     | Yes         | 9             | SD             |
| HD | 254       | Surgical | 47  | L4/L5     | No          | 6             | I              |
| HD | 257       | Surgical | 46  | L5/S1     | No          | 3             | I              |
| HD | 264       | Surgical | 65  | C3/C5     | Yes         | 6             | MD             |
| HD | 266       | Surgical | 27  | L5/S1     | No          | 4             | ND             |
| HD | 270       | Surgical | 45  | L5/S1     | No          | 6             | MD             |
| HD | 282       | Surgical | 21  | L5/S1     | No          | 4             | ND             |
| HD | 310       | Surgical | 37  | L4/L5     | Yes         | 5             | I              |
| HD | 319       | Surgical | 47  | L5/S1     | No          | 5             | MD             |
| HD | 330       | Surgical | 32  | L5/S1     | Yes         | 5.5           | MD             |
| HD | 346       | Surgical | 46  | C5/C6     | Yes         | 6             | MD             |
| HD | 359       | Surgical | 40  | L5/S1     | No          | 4             | ND             |
| HD | 360       | Surgical | 50  | C6        |             | 5.5           | MD             |
| HD | 370       | Surgical | 50  | L5/S1     | Yes         | 8             | SD             |
| HD | 375       | Surgical | 41  | L5/S1     | No          | 6             | MD             |
| HD | 380       | PM       | 33  | L2/L3     | Yes         | 4             | ND             |

Supplemental Table S1: Human Intervertebral disc sample information.

Samples were separated into different grades, 0-4 (Non-degenerate, ND), 4.1-6.9 (Moderately-degenerate, MD) and 7-12 (Severely-degenerate, SD).

| Grade   | Nucleus pulposus                           | Annulus Fibrosus                                                           |
|---------|--------------------------------------------|----------------------------------------------------------------------------|
| Grade 1 | Aggrecan-rich, bulging tissue              | Discrete fibrous lamellae                                                  |
| Grade 2 | Peripheral fibrous tissue                  | Mucinous material between lamellae                                         |
| Grade 3 | Consolidated fibrous tissue                | Extensive mucinous material between lamellae and loss of NP-AF demarcation |
| Grade 4 | Horizontal clefts parallel to the endplate | Focal lamellar disruptions (clefts)                                        |
| Grade 5 | Clefts through NP and AF                   | Clefts through NP and AF                                                   |

Supplemental Table S2: Modified Thompson scale used for histological grading.

| Category      | Term                                                                          | Count | List Total | Fold Enrichment | Bonferroni  | FDR (%)     |
|---------------|-------------------------------------------------------------------------------|-------|------------|-----------------|-------------|-------------|
| GOTERM_CC_FAT | GO:0000786-nucleosome                                                         | 29    | 274        | 11.48865113     | 3.89E-20    | 1.17E-19    |
| GOTERM_CC_FAT | GO:0044815-DNA packaging complex                                              | 29    | 274        | 11.03515175     | 1.44E-19    | 4.31E-19    |
| KEGG_PATHWAY  | mmu05322:Systemic lupus erythematosus                                         | 28    | 145        | 9.244522043     | 1.36E-17    | 9.26E-17    |
| GOTERM_CC_FAT | GO:0032993-protein-DNA complex                                                | 30    | 274        | 6.940729927     | 5.31E-14    | 1.55E-13    |
| GOTERM_CC_FAT | GO:0000788-nuclear nucleosome                                                 | 17    | 274        | 16.95293229     | 5.31E-14    | 1.55E-13    |
| GOTERM_CC_FAT | GO:0000790-nuclear chromatin                                                  | 41    | 274        | 4.705190592     | 5.31E-14    | 1.55E-13    |
| KEGG_PATHWAY  | mmu05034:Alcoholism                                                           | 29    | 145        | 6.356302521     | 1.81E-13    | 1.23E-12    |
| GOTERM_CC_FAT | GO:0000785-chromatin                                                          | 45    | 274        | 3.526793662     | 1.00E-10    | 2.99E-10    |
| GOTERM_BP_FAT | GO:0006334-nucleosome assembly                                                | 21    | 298        | 7.325542835     | 1.36E-08    | 6.48E-09    |
| GOTERM_BP_FAT | GO:0031497-chromatin assembly                                                 | 22    | 298        | 6.724970594     | 2.18E-08    | 1.04E-08    |
| GOTERM_CC_FAT | GO:0044454-nuclear chromosome part                                            | 43    | 274        | 3.196780065     | 1.04E-08    | 3.12E-08    |
| GOTERM_CC_FAT | GO:0000228-nuclear chromosome                                                 | 44    | 274        | 3.111166634     | 1.40E-08    | 4.19E-08    |
| GOTERM_BP_FAT | GO:0065004-protein-DNA complex assembly                                       | 23    | 298        | 5.455785235     | 5.10E-07    | 2.43E-07    |
| GOTERM_BP_FAT | GO:0006333-chromatin assembly or disassembly                                  | 22    | 298        | 5.722124102     | 5.60E-07    | 2.67E-07    |
| GOTERM_BP_FAT | GO:0006323-DNA packaging                                                      | 22    | 298        | 5.575402971     | 9.31E-07    | 4.44E-07    |
| GOTERM_BP_FAT | GO:0034728-nucleosome organization                                            | 21    | 298        | 5.874256047     | 9.94E-07    | 4.74E-07    |
| GOTERM_BP_FAT | GO:0071103-DNA conformation change                                            | 24    | 298        | 4.907752835     | 1.67E-06    | 7.97E-07    |
| GOTERM_BP_FAT | GO:0071824-protein-DNA complex subunit organization                           | 23    | 298        | 4.671049002     | 1.10E-05    | 5.26E-06    |
| GOTERM_CC_FAT | GO:0044427-chromosomal part                                                   | 51    | 274        | 2.441895877     | 1.59E-06    | 4.76E-06    |
| GOTERM_CC_FAT | GO:0005694-chromosome                                                         | 53    | 274        | 2.254036067     | 1.11E-05    | 3.34E-05    |
| GOTERM_BP_FAT | GO:0006325-chromatin organization                                             | 45    | 298        | 2.46179945      | 1.31E-04    | 6.25E-05    |
| GOTERM_BP_FAT | GO:0006342-chromatin silencing                                                | 18    | 298        | 5.232530596     | 1.59E-04    | 7.59E-05    |
| GOTERM_BP_FAT | GO:0002227-innate immune response in mucosa                                   | 8     | 298        | 18.24677336     | 2.53E-04    | 1.21E-04    |
| GOTERM_BP_FAT | GO:0045814-negative regulation of gene expression, epigenetic                 | 18    | 298        | 4.988019821     | 3.31E-04    | 1.58E-04    |
| GOTERM_BP_FAT | GO:0002385-mucosal immune response                                            | 8     | 298        | 14.82550336     | 0.001547429 | 7.38E-04    |
| GOTERM_BP_FAT | GO:0002251-organ or tissue specific immune response                           | 8     | 298        | 14.82550336     | 0.001547429 | 7.38E-04    |
| GOTERM_BP_FAT | GO:0051276-chromosome organization                                            | 53    | 298        | 2.073223424     | 0.001628717 | 7.77E-04    |
| GOTERM_BP_FAT | GO:0019730-antimicrobial humoral response                                     | 8     | 298        | 13.95341492     | 0.002553995 | 0.001218542 |
| GOTERM_BP_FAT | GO:0019731-antibacterial humoral response                                     | 8     | 298        | 13.95341492     | 0.002553995 | 0.001218542 |
| GOTERM_BP_FAT | GO:0016458-gene silencing                                                     | 19    | 298        | 3.456252316     | 0.032467809 | 0.015726583 |
| GOTERM_BP_FAT | GO:0050830-defense response to Gram-positive bacterium                        | 10    | 298        | 6.308724832     | 0.080063022 | 0.039756536 |
| GOTERM_BP_FAT | GO:0008045-motor neuron axon guidance                                         | 7     | 298        | 10.9240551      | 0.095083142 | 0.04759739  |
| GOTERM_BP_FAT | GO:0040029-regulation of gene expression, epigenetic                          | 19    | 298        | 3.095434767     | 0.139043703 | 0.071312935 |
| GOTERM_MF_FAT | GO:0031492-nucleosomal DNA binding                                            | 8     | 277        | 7.481046931     | 0.052682154 | 0.105860719 |
| GOTERM_MF_FAT | GO:0031720-haptoglobin binding                                                | 4     | 277        | 29.92418773     | 0.105462586 | 0.21787281  |
| GOTERM_CC_FAT | GO:0005833-hemoglobin complex                                                 | 4     | 274        | 28.91970803     | 0.072617163 | 0.225427555 |
| GOTERM_CC_FAT | GO:0031838-haptoglobin-hemoglobin complex                                     | 4     | 274        | 28.91970803     | 0.072617163 | 0.225427555 |
| GOTERM_BP_FAT | GO:0006959-humoral immune response                                            | 10    | 298        | 4.941834452     | 0.460498993 | 0.293624708 |
| GOTERM_BP_FAT | GO:0022008-neurogenesis                                                       | 50    | 298        | 1.663917324     | 0.727773051 | 0.618072522 |
| GOTERM_BP_FAT | GO:0007399-nervous system development                                         | 63    | 298        | 1.536195249     | 0.788150999 | 0.736752708 |
| GOTERM_MF_FAT | GO:0031490-chromatin DNA binding                                              | 10    | 277        | 4.336838801     | 0.287792089 | 0.661993647 |
| GOTERM_BP_FAT | GO:0030182-neuron differentiation                                             | 43    | 298        | 1.720638716     | 0.863779648 | 0.945407611 |
| GOTERM_BP_FAT | GO:0098754-detoxification                                                     | 6     | 298        | 8.471716203     | 0.87836997  | 0.99886609  |
| GOTERM_MF_FAT | GO:0003677-DNA binding                                                        | 64    | 277        | 1.50325898      | 0.364309242 | 0.882709431 |
| GOTERM_BP_FAT | GO:0031175-neuron projection development                                      | 34    | 298        | 1.866915237     | 0.897664942 | 1.080317982 |
| GOTERM_BP_FAT | GO:0045892-negative regulation of transcription, DNA-templated                | 42    | 298        | 1.710635003     | 0.925906245 | 1.232412284 |
| GOTERM_BP_FAT | GO:0048666-neuron development                                                 | 37    | 298        | 1.786787049     | 0.939239718 | 1.325739367 |
| GOTERM_BP_FAT | GO:1903507-negative regulation of nucleic acid-templated transcription        | 42    | 298        | 1.703614613     | 0.940403494 | 1.334832098 |
| GOTERM_MF_FAT | GO:0031491-nucleosome binding                                                 | 8     | 277        | 5.093478762     | 0.483229381 | 1.283649355 |
| GOTERM_BP_FAT | GO:0048812-neuron projection morphogenesis                                    | 23    | 298        | 2.171889027     | 0.96730562  | 1.616700812 |
| GOTERM_BP_FAT | GO:1902679-negative regulation of RNA biosynthetic process                    | 42    | 298        | 1.687455667     | 0.97593281  | 1.620843725 |
| KEGG_PATHWAY  | mmu05203:Viral carcinogenesis                                                 | 16    | 145        | 2.592075391     | 0.167436844 | 1.240430365 |
| GOTERM_BP_FAT | GO:0030030-cell projection organization                                       | 45    | 298        | 1.63717215      | 0.981725905 | 1.889034028 |
| GOTERM_BP_FAT | GO:2000113-negative regulation of cellular macromolecule biosynthetic process | 47    | 298        | 1.612959856     | 0.982647822 | 1.913232061 |
| GOTERM_MF_FAT | GO:0005344-oxygen transporter activity                                        | 4     | 277        | 17.09953584     | 0.595593669 | 1.756183198 |
| KEGG_PATHWAY  | mmu05144:Malaria                                                              | 6     | 145        | 7.113479624     | 0.189991897 | 1.425014745 |
| GOTERM_BP_FAT | GO:0048699-generation of neurons                                              | 45    | 298        | 1.623230294     | 0.991097929 | 2.224687786 |
| GOTERM_BP_FAT | GO:0006335-DNA replication-dependent nucleosome assembly                      | 6     | 298        | 7.116241611     | 0.992760062 | 2.320929568 |
| GOTERM_BP_FAT | GO:0034723-DNA replication-dependent nucleosome organization                  | 6     | 298        | 7.116241611     | 0.992760062 | 2.320929568 |
| GOTERM_BP_FAT | GO:0051253-negative regulation of RNA metabolic process                       | 43    | 298        | 1.640918003     | 0.993940339 | 2.403724643 |
| GOTERM_MF_FAT | GO:0043566-structure-specific DNA binding                                     | 11    | 277        | 3.393464587     | 0.66300335  | 2.106153885 |
| GOTERM_BP_FAT | GO:0032776-DNA methylation on cytosine                                        | 6     | 298        | 6.84254001      | 0.997359314 | 2.789240242 |
| GOTERM_BP_FAT | GO:0008285-negative regulation of cell proliferation                          | 25    | 298        | 1.982019165     | 0.998865808 | 3.179924089 |
| GOTERM_MF_FAT | GO:0005230-extracellular ligand-gated ion channel activity                    | 4     | 277        | 14.96209386     | 0.756693103 | 2.728250104 |
| GOTERM_BP_FAT | GO:0098542-defense response to other organism                                 | 19    | 298        | 2.25347651      | 0.999367138 | 3.448714516 |
| GOTERM_CC_FAT | GO:0005887-integral component of plasma membrane                              | 25    | 274        | 1.964654078     | 0.598711543 | 2.696339101 |
| GOTERM_BP_FAT | GO:0010558-negative regulation of macromolecule biosynthetic process          | 47    | 298        | 1.560579301     | 0.999657298 | 3.73050617  |
| GOTERM_BP_FAT | GO:0048468-cell development                                                   | 59    | 298        | 1.462716886     | 0.99765405  | 3.904209281 |
| GOTERM_BP_FAT | GO:0009605-response to external stimulus                                      | 53    | 298        | 1.499526103     | 0.99988074  | 4.2135072   |
| GOTERM_MF_FAT | GO:0015276-ligand-gated ion channel activity                                  | 5     | 277        | 7.874786244     | 0.914425545 | 4.697250525 |
| GOTERM_MF_FAT | GO:0022834-ligand-gated channel activity                                      | 5     | 277        | 7.874786244     | 0.914425545 | 4.697250525 |
| KEGG_PATHWAY  | mmu04080:Neuroactive ligand-receptor interaction                              | 7     | 145        | 4.681520778     | 0.436956509 | 3.836983827 |
| GOTERM_MF_FAT | GO:0020037-heme binding                                                       | 8     | 277        | 4.05751698      | 0.922210935 | 4.874991139 |

Supplemental Table S3: Functional Annotation Analysis of DEGs from Microarray Data.

| Gene Name        | Primer Location |       | Primer Sequence            |                            |
|------------------|-----------------|-------|----------------------------|----------------------------|
|                  | Start           | End   | Forward                    | Reverse                    |
| SLC16A3 Promoter | -1399           | -1231 | 5'-ccccgtaagtggagaatgg-3'  | 5'-ggcgactttaagtgctctca-3' |
| SLC16A3 Intron   | +775            | +902  | 5'-cctactccaggcaatacgg-3'  | 5'-tggaagtagtgggccagtcg-3' |
| Car12            | -172            | -24   | 5'-gagtcgccacataaaaagca-3' | 5'- ccgctggctctaagctgt-3'  |

Supplemental Table S4: Primer Sequences used for Chromatin Immunoprecipitations
